# Supplementary material for: An all-sky camera images classification method using cloud cover features
Source: Copernicus journal article supplement (doi:10.5194/amt-2021-379), 2021-12-06
Supplement: Supplementary file [file amt-2021-379-AC2-supplement.pdf]

## Replies to comments of Reviewer 2

Authors would like to express sincere thanks to an anonymous reviewer for his/her valuable comments and suggestions. We carefully revised the manuscript following the given suggestions and comments. Our replies to the comments and suggestions are given below.

### Specific comments

In my opinion, the central research topic addressed in this paper was recognition of single pixels cloudy or cloud-free. Performance of all the other findings or suggestions are subject to that. As to recognition, the central idea was to compare (subtract/correlate) each routinely measured image with a clear sky image obtained at the same date (ie. with the same position of the sun). As we are essentially discussing automated classification here, it remained unclear to me how these cloudless images are routinely obtained? And how does the algorithm perform if there is cloud near but not (fully) overlapping the sun? (I wondered if that area should be outright regarded useless and left out in calculations, instead.) But you make a strong claim! (Line: 232: "Generally speaking, the cloud detection accuracy of traditional methods around the sun and near-horizon regions is relatively low, but the method used in this paper can achieve better results in all regions.")

We first obtain the cloud features of ASC images and then perform the classification in this paper. During this process, features can be extracted directly when there is no sun in the image. When the sun is present, we use the difference method to remove the sun from the image. The difference method is a common method for removing the sun in the field of cloud image processing and has been used in several articles. Each cloud image records the shooting time during the shooting process, so the corresponding cloud-free images can be artificially selected according to the shooting time. In addition, during the selection of the dataset, we discard those images where the sun partially or completely overlaps with the cloud. Therefore, when the sun is present in the image, the sun and clouds do not overlap each other, and the sun can be removed using the difference method.

### Technical Corrections

Line 16: The starting sentence (!) contains the word "polymer", a term related to chains of molecules? Speaking about clouds, I wonder if you actually thought of \*aerosols\* instead?

Line 65: Finally, \*it is our conclusion\* in Section 5.

Thank you very much for pointing the mistake. The mistake is corrected in the revised manuscript.

Figure 4. The left-hand image (a) is claimed to be original, but looks suspiciously thresholded. The other one (b) looks more like an original. Maybe I just did not understand.

The left-hand image (a) of Figure 4 is the grayscale image after we extract the cloud region using the threshold segmentation method. The purpose of using the threshold segmentation is to remove the pure sky background region from the image, leaving only the region where the clouds are mixed with the sky background. As can

be seen from Fig. 4, the grayscale value of the thin clouds in the processed grayscale image is reduced because the effect of the sky background on the cloud grayscale value is eliminated by the method in this paper.
